# Supplementary material for: Expression Profiling of Long Noncoding RNA Splice Variants in Human Microvascular Endothelial Cells: Lipopolysaccharide EffectsIn Vitro
Source: Hindawi journal article supplement (doi:10.1155/2017/3427461), 2017-01-01
Supplement: f1 [file 3427461.f1.pdf]

NONHSAT087636 CAAGATGGAAGACTCCTAGGATAGGTCTCTCTCATGGAGGGATTGGTAATAAA---AAAA  
NONHSAT087634 C-----ACGATGGTAAGAG  
NONHSAT087635 CAAGATGGAAGACTCCTAGGATAGGTCTCTCTCATGGAGGGATTGGCACGATGGTAAGAG  
\* \* \* \*

NONHSAT087636 TCAT-----GGGAAAAGAAA-----TAAGGGAGGG---TGGAAA-AAACACACCTTAGA  
NONHSAT087634 TCCAGTGGATGGAAAAGGCCTCCTCCTTAAAGATGGTGTGGAAAACGAGCACTGCACAGG  
NONHSAT087635 TCCAGTGGATGGAAAAGGCCTCCTCCTTAAAGATGGTGTGGAAAACGAGCACTGCACAGG  
\*\* \* \* \* \* \* \* \* \* \* \* \* \* \* \* \*

NONHSAT087636 AAACAACCTTCTGATGTCCCGGG-----GCTACAC-----AA  
NONHSAT087634 GAAACACAAATCAGGTCCCCTGAAATCCAGCCCAACCTGGCCAGACCCTCCAGTGCCCAT  
NONHSAT087635 GAAACACAAATCAGGTCCCCTGAAATCCAGCCCAACCTGGCCAGACCCTCCAGTGCCCAT  
\*\* \* \* \* \* \* \* \* \* \* \*

NONHSAT087636 TGGGGGAGCTGAGC-----  
NONHSAT087634 CAGGGCTTATGAACAGGGTCTTCAGTGTCTTTGTTAGGGGTGGTTAAAAGGAGCACGT  
NONHSAT087635 CAGGGCTTATGAACAGGGTCTTCAGTGTCTTTGTTAGGGGTGGTTAAAAGGAGCACGT  
\*\*\* \* \* \*

NONHSAT087636 -----  
NONHSAT087634 GCTTATAGGGGATGCTGCTGAGCTCCATGATTTTACTTCCTGTCTAACCTGTTGATGCT  
NONHSAT087635 GCTTATAGGGGATGCTGCTGAGCTCCATGATTTTACTTCCTGTCTAACCTGTTGATGCT

NONHSAT087636 -----  
NONHSAT087634 ACAAACCTCTTTTAAAACAGTTACCATGGGAACCTTTCCCTAGCAAGCATCTTTCAAGA  
NONHSAT087635 ACAAACCTCTTTTAAAACAGTTACCATGGGAACCTTTCCCTAGCAAGCATCTTTCAAGA

NONHSAT087636 -----  
NONHSAT087634 AACGTTACAGGGAGCTGTTGTTGGGACAGGACAAGAGTCCACATCCCCTG---CCCAGTG  
NONHSAT087635 AACGTTACAGGTG-CTGGTG-----AATTCATGCCCTTGGTGTCAATAA

NONHSAT087636 -----  
NONHSAT087634 CCTGGTTCTGGGTCTATGTCACCGAAGCGCATCAGCCCATCTGTGAGCCAAACCCACTAG  
NONHSAT087635 GCTTTTCTGAGTCTTAGA-----ATG-----

NONHSAT087636 -----  
NONHSAT087634 CCTTGTGCCTTCTCTTAAATCCCCGCGGAGGA-----AAACAACCTCTGCC--TTCTA  
NONHSAT087635 ---TGTGGCTTGAAC-----TGAGAGGACTTTCAAACAGATAATGCGAAGTTTC

NONHSAT087636 -----  
NONHSAT087634 CAGTACGAACAGCGAGGGTCTGCTGGGAACCAATACAACCTCGCGTCCCAGTGCAGCAAT  
NONHSAT087635 CAA-----TGCAAATGCTCTCGGGG-----TTAAGTGTGAGTGAAGTGCA

NONHSAT087636 -----  
NONHSAT087634 GTTGCCAGGTAACAAATGTAGAAAACATAC--TCCAAAACTGTATGTGACAATATACAAC  
NONHSAT087635 GT-GGAAGG-----TAGGGGATAAAATGATCTCAGTGTA-----TATGGAGG

NONHSAT087636 -----  
NONHSAT087634 CTCCGCTCTGCAGCTGATAACCGAGGGAGTGTAAAACACCGGTTCTTAAACACTTGG  
NONHSAT087635 CCCC--CTTAAGC-----ATTCAAAA--ATTCTATATACAGT---

```

NONHSAT087636 -----
NONHSAT087634 GTTTTTG-----GTGTGAAAGTAAAATAAACGGGATACTTCTCTTGTAAATATAAG
NONHSAT087635 GTTTTCAATGTATTATGTATCAGCAAAACAA-----AATACCC-----C

NONHSAT087636 -----
NONHSAT087634 ACAGGCATACAACCTCACACACGTATCCACTAATCGGAAATAGTAGAGGGGTTTGAATAG
NONHSAT087635 ATAGGGCTATAA-----TC-----AGCTCAGGGGGTCACCTCAG

NONHSAT087636 -----
NONHSAT087634 CTAT--CTGCAGTGCATCCCAGCCTTCACTCTTACCCTCAAGATGAATTCCAGAAAACCT
NONHSAT087635 CAAGAGATGCT-----CTGGCTATCACTCCTACT-----

NONHSAT087636 -----
NONHSAT087634 ACAGAAACGATAACTGAGGAAGAGCCTTTCTCTGTGCGGGACAAGCTCTCTCTAACA
NONHSAT087635 -----ACGG-----GATTTCTCTCTC-----ATCAGAA

NONHSAT087636 -----
NONHSAT087634 TTGTGAGGAAG--CTACCCACAAGAAAGACACCAGCAGAAATTAAG-----GAAAAGCTC
NONHSAT087635 CCAGTAGGTGGTCAAAACCACAATAA-----TGCATAAATGAAGGCAGGGAATTGGGT

NONHSAT087636 -----
NONHSAT087634 ATGCATTGTTATTAAAAAAAATGTGCTTCCATTCCACTCCATTTTAAAGGTCTACCTTT
NONHSAT087635 ATCCAATGTGAGCAACTGAAAAGGTGCCATGT-----ATTAGCTATTTGCCATT

NONHSAT087636 -----
NONHSAT087634 AAAACTCATTTGGCTAACCAAGCAGTGACTACTTGCTTCTCAGATCAAATAACCAGTGCAG
NONHSAT087635 A-----TGGTTCTGCAAG--TG---CTCAGATGACTCATAAAATGACCAGAACAA

NONHSAT087636 -----
NONHSAT087634 CCTGTTCCCACCCCAAACGAAAACAAGATAGACACTGCTCTCTAGTAGGCAGAGCTCCAA
NONHSAT087635 AA-----

NONHSAT087636 -----
NONHSAT087634 AGTGGGTACAGGGCACTGAATAGCTCCCTCACATTGTACTCATGTAACTAAAGGCTGGC
NONHSAT087635 -----

NONHSAT087636 ----- 406
NONHSAT087634 TAgcatgggagaaagctgagagacttctgagggccttgtgttcaaatcccagct 1824
NONHSAT087635 ----- 1464

```

**CLUSTAL O (1.2.1) multiple sequence alignment of overlapping splice variants of HOTAIRM1**

```

NONHSAT119666 -----
NONHSAT119667 -----
NONHSAT119668 -----
NONHSAT119664 -----AAAAGTTTGCCGGCTTCCGCAGTGATGGATCACCG
NONHSAT119665 -----AAAAGTTTGCCGGCTTCCGCAGTGATGGATCACCG

```

NONHSAT119666 -----  
NONHSAT119667 -----  
NONHSAT119668 -----  
NONHSAT119664 TTTTAGTGGCATTAAATCCCCGGCGCTCCGCCGTCTAGGTGACGCGCAGTCGCCCCCCC  
NONHSAT119665 TTTTAGTGGCATTAAATCCCCGGCGCTCCGCCGTCTAGGTGACGCGCAGTCGCCCCCCC

NONHSAT119666 -----GATTTGGAGTGCTGGA  
NONHSAT119667 -----  
NONHSAT119668 -----  
NONHSAT119664 AGGCAGCCTAGGCGGCGGCAGCTGCTGCGGCGACTGCAAAGGCCGATTTGGAGTGCTGGA  
NONHSAT119665 AGGCAGCCTAGGCGGCGGCAGCTGCTGCGGCGACTGCAAAGGCCGATTTGGAGTGCTGGA

NONHSAT119666 GCGAAGAAGAGCAAAAGCTGCGTTCTGCGCGCGCCCGACTCCGCTGCCCGCCCCGCCAGG  
NONHSAT119667 -----  
NONHSAT119668 -----  
NONHSAT119664 GCGAAGAAGAGCAAAAGCTGCGTTCTGCGCGCGCCCGACTCCGCTGCCCGCCCCGCCAGG  
NONHSAT119665 GCGAAGAAGAGCAAAAGCTGCGTTCTGCGCGCGCCCGACTCCGCTGCCCGCCCCGCCAGG

NONHSAT119666 CCTCCGGGAGGTGGGGGCTGGGAGGCGTCCCCCGCTCCCGCCCCCTCCCCACCGTTCAAT  
NONHSAT119667 -----  
NONHSAT119668 -----  
NONHSAT119664 CCTCCGGGAGGTGGGGGCTGGGAGGCGTCCCCCGCTCCCGCCCCCTCCCCACCGTTCAAT  
NONHSAT119665 CCTCCGGGAGGTGGGGGCTGGGAGGCGTCCCCCGCTCCCGCCCCCTCCCCACCGTTCAAT

NONHSAT119666 **GAAAGATGAACTGGCGAGA**-----  
NONHSAT119667 -----TGCTAGAAAGGAAAGGAATAAGGAGGAGATAAAATGACGC  
NONHSAT119668 -----  
NONHSAT119664 GAAAGATGAACTGGCGAGAG-----  
NONHSAT119665 GAAAGATGAACTGGCGAGAG-----

NONHSAT119666 -----  
NONHSAT119667 CGAGGCCCTGAACTGTTTCATGGCATCCGCGGCTCAGCCAAGCTGttgttttaaagagca  
NONHSAT119668 -----  
NONHSAT119664 -----  
NONHSAT119665 -----

NONHSAT119666 -----  
NONHSAT119667 ataaaaatgaattatgactaaacgccttctaacttaatgctttcggacggggatccccgg  
NONHSAT119668 -----  
NONHSAT119664 -----  
NONHSAT119665 -----

NONHSAT119666 -----  
NONHSAT119667 caaaTAACGTAAGAGGATTTTATTTGTGCATGTGTTCCGCAATTGATCTCTTTGATGA  
NONHSAT119668 -----  
NONHSAT119664 -----  
NONHSAT119665 -----

NONHSAT119666 -----**GAAAGCGTTTGATTTATGAGCGTAGGACGAATCGCATCCAGGAGCT**  
NONHSAT119667 CATTCTCATTCATAGAAAGCGTTTGATTTATGAGCGTAGGACGAATCGCATCCAGGAGCT  
NONHSAT119668 -----  
NONHSAT119664 -----GACGAATCGCATCCAGGAGCT  
NONHSAT119665 -----

NONHSAT119666 GCGCAGCCCTGGCCGCTGCCGGGACGCCCTGCTCCGCGCTGAGCTTGGGGCCAGAAACCA  
NONHSAT119667 GCGCAGCCCTGGCCGCTGCCGGGACGCCCTGCTCCGCGCTGAGCTTGGGGCCAGAAACCA  
NONHSAT119668 -----AAACA  
NONHSAT119664 GCGCAGCCCTGGCCGCTGCCGGGACGCCCTGCTCCGCGCTGAGCTTGGGGCCAGAAACCA  
NONHSAT119665 -----

NONHSAT119666 GCCATAGTCCCCACACTCCGCCGCCGAGCTGAGATTTAGCGGAGGAAGGGGCGAGGGAA  
NONHSAT119667 GCCATAGTCCCCACACTCCGCCGCCGAGCTGAGATTTAGCGGAGGAAGGGGCGAGGGAA  
NONHSAT119668 GGTTTAAGAATGA-----AATATTGATTTTCTGACCC-----TGAA-  
NONHSAT119664 GCCATAGTCCCCACACTCCGCCGCCGAGCTGAGATTTAGCGGAGGAAGGGGCGAGGGAA  
NONHSAT119665 -----

NONHSAT119666 GGTAGGGAGCAAACCTATGAAGAAACATCGCGTTGTCA-----TTGGAAC TT  
NONHSAT119667 GGTAGGGAGCAAACCTATGAAGAAACATCGCGTTGTCA-----TTGGAAC TT  
NONHSAT119668 -----AA---AAAAAAAAAATCCTAGAGTGACTGAACCAGAGGATTGGAAGA  
NONHSAT119664 GGTAGGGAGCAAACCTATGAAGAAACATCGCGTTGTCA-----TTGGAAC TT  
NONHSAT119665 -----

NONHSAT119666 CCAAGCCTTTGCTGTTAAGAGCCAGGTTCTTAAATCAACCCGCCCCACACACATGTTGCT  
NONHSAT119667 CCAAGCCTTTGCTGTTAAGAGCCAGGTTCTTAAATCAACCCGCCCCACACACATGTTGCT  
NONHSAT119668 ----ACATTTTCT---AGGGTGCATTTTCCA-GAT-----AGTAATCActgttttgt  
NONHSAT119664 CCAAGCCTTTGCTGTTAAGAGCCAGGTTCTTAAATCAACCCGCCCCACACACATGTTGCT  
NONHSAT119665 -----

NONHSAT119666 TACATGCTGCGTTTTTC-----TCACGGTCTGTTTTGCCTGAACCCATCAACAGCTGGG  
NONHSAT119667 TACATGCTGCGTTTTTC-----TCACGGTCTGTTTTGCCTGAACCCATCAACAGCTGGG  
NONHSAT119668 tttatTTTTgttttctctatcttttAGGCTGTTTTGCCTGAACCCATCAACAGCTGGG  
NONHSAT119664 TACATGCTGCGTTTTTC-----TCACGGTCTGTTTTGCCTGAACCCATCAACAGCTGGG  
NONHSAT119665 -----GTCTGTTTTGCCTGAACCCATCAACAGCTGGG  
\*\*\*\*\*

NONHSAT119666 AGATTAATCAACCACACTGAAAATGTGGAGGGATTTATGGGGGAGGGGGTTGAAATGTGG  
NONHSAT119667 AGATTAATCAACCACACTGAAAATGTGGAGGGATTTATGGGGGAGGGGGTTGAAATGTGG  
NONHSAT119668 AGATTAATCAACCACACTGAAAATGTGGAGGGATTTATGGGGGAGGGGGTTGAAATGTGG  
NONHSAT119664 AGATTAATCAACCACACTGAAAATGTGGAGGGATTTATGGGGGAGGGGGTTGAAATGTGG  
NONHSAT119665 AGATTAATCAACCACACTGAAAATGTGGAGGGATTTATGGGGGAGGGGGTTGAAATGTGG  
\*\*\*\*\*

NONHSAT119666 GTGTTTGAACAAAAGTGTATAAACAAATGAATTGTTGATAACTTAGTTATTGACCTGGA  
NONHSAT119667 GTGTTTGAACAAAAGTGTATAAACAAATGAATTGTTGATAACTTAGTTATTGACCTGGA  
NONHSAT119668 GTGTTTGAACAAAAGTGTATAAACAAATGAATTGTTGATAACTTAGTTATTGACCTGGA  
NONHSAT119664 GTGTTTGAACAAAAGTGTATAAACAAATGAATTGTTGATAACTTAGTTATTGACCTGGA  
NONHSAT119665 GTGTTTGAACAAAAGTGTATAAACAAATGAATTGTTGATAACTTAGTTATTGACCTGGA  
\*\*\*\*\*

NONHSAT119666 GACTGGTAGCTTATTAAGAAACTCCGTGTTACTCA-----  
NONHSAT119667 GACTGGTAGCTTATTAAGAAACTCCGTGTTACTCATTCTGGAGTTGGGGGTTTCTGTA  
NONHSAT119668 GACTGGTAGCTTATTAAGAAACTCCGTGTTACTCATTCTGGAGTTGGGGGTTTCTGTA  
NONHSAT119664 GACTGGTAGCTTATTAAGAAACTCCGTGTTACTCATTCTGGAGTTGGGGGTTTCTGTA  
NONHSAT119665 GACTGGTAGCTTATTAAGAAACTCCGTGTTACTCATTCTGGAGTTGGGGGTTTCTGTA  
\*\*\*\*\*

NONHSAT119666 -----  
NONHSAT119667 GGCAC TTTATTTCTCCACTTTCAAGAGCTTGGGCTTGGCCCAAATCTTAGACTGTCCAAT  
NONHSAT119668 GGCAC TTTATTTCTCCACTTTCAAGAGCTTGGGCTTGGCCCAAATCTTAGACTGTCCAAT  
NONHSAT119664 GGCAC TTTATTTCTCCACTTTCAAGAGCTTGGGCTTGGCCCAAATCTTAGACTGTCCAAT  
NONHSAT119665 GGCAC TTTATTTCTCCACTTTCAAGAGCTTGGGCTTGGCCCAAATCTTAGACTGTCCAAT

NONHSAT119666 -----  
NONHSAT119667 TCTGCCTCTATTACCAATTTAAATCTATGGCTTGAACCTGTGCACTGAAAATCAAATCCT  
NONHSAT119668 TCTGCCTCTATTACCAATTTAAATCTATGGCTTGAACCTGTGCACTGAAAATCAAATCCT  
NONHSAT119664 TCTGCCTCTATTACCAATTTAAATCTATGGCTTGAACCTGTGCACTGAAAATCAAATCCT  
NONHSAT119665 TCTGCCTCTATTACCAATTTAAATCTATGGCTTGAACCTGTGCACTGAAAATCAAATCCT

NONHSAT119666 -----  
NONHSAT119667 TTaaaaagaaaggaggagaagaagaagcaa-----  
NONHSAT119668 TTaaaaagaaaggaggagaagaagaagcaaaaaagaaagaaaaACACTTATTAGAAGCCC  
NONHSAT119664 TTaaaaagaaaggaggagaagaagaagcaaaaaagaaagaaaaACACTTATTAGAAGCCC  
NONHSAT119665 TTaaaaagaaaggaggagaagaagaagcaaaaaagaaagaaaaACACTTATTAGAAGCCC

NONHSAT119666 -----  
NONHSAT119667 -----  
NONHSAT119668 TAGTCATTTTTTGGCTTTCGTTTTGTTGCTGTCCATTGAAGACTTTGAACATGCCGCCT  
NONHSAT119664 TAGTCATTTTTTGGCTTTCGTTTTGTTGCTGTCCATTGAAGACTTTGAACATGCCGCCT  
NONHSAT119665 TAGTCATTTTTTGGCTTTCGTTTTGTTGCTGTCCATTGAAGACTTTGAACATGCCGCCT

NONHSAT119666 -----  
NONHSAT119667 -----  
NONHSAT119668 TAATAAATGTATTAAATTTGAAAAAGAGGATAAA  
NONHSAT119664 TAATAAATGTATTAAATTTGAAAAAGA-----  
NONHSAT119665 TAATAAATGTATTAAATTTGAAAAAGA-----

**Supplementary table 1: Total reads from the RNA sequencing experiments at each treatment and percentage of reads mapped to coding (mRNA) and non-coding (ncRNA) transcripts.**

| <b>Experiment</b>  | <b>Total reads<br/>(in millions)</b> | <b>Reads mapped to mRNA<br/>(in millions)</b> | <b>Reads mapped to ncRNA<br/>(in millions)</b> |
|--------------------|--------------------------------------|-----------------------------------------------|------------------------------------------------|
| 3 h control        | 29.31                                | 9.11 (31.08%)                                 | 3.26 (11.11%)                                  |
| 3 h LPS treatment  | 28.35                                | 14.27 (37.87%)                                | 4.52 (12%)                                     |
| 24 h control       | 37.68                                | 9.2 (32.45%)                                  | 3.56 (12.57%)                                  |
| 24 h LPS treatment | 34.86                                | 12.99 (36.26%)                                | 5.22 (14.98%)                                  |

**Supplementary Table 2:** Expression level of regulatory (functionally annotated) splice variants of lncRNAs in 3 and 24 h LPS treated human microvascular endothelial cells, their genomic origins, and coding and non-coding indexes.

| Traditional IDs | Regulatory NONCODE splice variants | 3h (Fold change) | 24h (Fold change) | Chromosome Number | Transcription Start site | Transcription End site | Strand   | Exon Number | Length | CNCI Score | References |
|-----------------|------------------------------------|------------------|-------------------|-------------------|--------------------------|------------------------|----------|-------------|--------|------------|------------|
| ADAMTS9-AS2     | NONHSAT090266                      | 2.289            | 3.307             | 3                 | 64670803                 | 64997143               | Positive | 6           | 1969   | -0.036     | [1]        |
|                 | NONHSAT090274                      | 0.079            | 2.270             |                   | 64949871                 | 64964665               |          | 1           | 14794  | -0.112     |            |
| AK082072        | NONHSAT102610                      | 0.720            | ID                | 5                 | 87564698                 | 87732491               | Positive | 3           | 608    | -0.077     | [2]        |
|                 | NONHSAT102619                      | 0.726            | 0.113             |                   | 87564863                 | 87583473               |          | 7           | 717    | -0.145     |            |
|                 | NONHSAT102626                      | 0.103            | 0.509             |                   | 87577500                 | 87587245               |          | 5           | 881    | -0.088     |            |
|                 | NONHSAT102631                      | 0.308            | 0.694             |                   | 87578275                 | 87582807               |          | 2           | 1875   | -0.016     |            |
|                 | NONHSAT102632                      | 0.144            | 1.365             |                   | 87578275                 | 87587291               |          | 3           | 686    | -0.267     |            |
|                 | NONHSAT102634                      | 0.144            | IU                |                   | 87578328                 | 87581854               |          | 2           | 649    | -0.122     |            |
|                 | NONHSAT102637                      | 0.301            | 0.632             |                   | 87578532                 | 87584540               |          | 3           | 1547   | -0.133     |            |
|                 | NONHSAT102640                      | 0.329            | 0.273             |                   | 87582902                 | 87587291               |          | 2           | 628    | -0.195     |            |
| NONHSAT102641   | 0.315                              | 0.538            | 87588449          | 87589492          | 2                        | 1043                   | -0.262   |             |        |            |            |
| ANRIL           | NONHSAT130413                      | 0.480            | IU                | 9                 | 21994776                 | 22032955               | Positive | 4           | 631    | -0.102     | [3]        |
|                 | NONHSAT130414                      | 1.081            | IU                |                   | 21994789                 | 22077889               |          | 4           | 856    | -0.347     |            |
|                 | NONHSAT130416                      | 1.294            | 0.200             |                   | 21994789                 | 22077889               |          | 6           | 1067   | -0.196     |            |
|                 | NONHSAT130417                      | 1.441            | 0.336             |                   | 21994789                 | 22077889               |          | 8           | 1260   | -0.347     |            |
|                 | NONHSAT130422                      | 0.180            | 1.372             |                   | 21994789                 | 22121093               |          | 7           | 1646   | -0.347     |            |
|                 | NONHSAT130423                      | 2.111            | 4.777             |                   | 21994789                 | 22121093               |          | 8           | 1782   | -0.347     |            |
|                 | NONHSAT130425                      | 0.295            | 0.456             |                   | 21994789                 | 22121093               |          | 6           | 1582   | -0.078     |            |
|                 | NONHSAT130433                      | 0.235            | 0.476             |                   | 22111739                 | 22128078               |          | 4           | 9091   | -0.212     |            |



|                           |                |                |                |    |           |           |          |   |      |        |      |
|---------------------------|----------------|----------------|----------------|----|-----------|-----------|----------|---|------|--------|------|
| CCAT1                     | NONHSAT129019  | 0.302          | 1.124          | 8  | 128098507 | 128099755 | Negative | 1 | 1248 | -0.142 | [4]  |
| CDR1-AS                   | NONHSAT138820  | ID             | ID             | X  | 139865228 | 139866833 | Positive | 3 | 923  | -0.073 | [5]  |
| CRNDE                     | NONHSAT142619  | 1.422          | IU             | 16 | 54957192  | 54962798  | Negative | 3 | 600  | -0.432 | [6]  |
|                           | NONHSAT142620  | ID             | 0.682          |    | 54958770  | 54963061  |          | 2 | 735  | -0.157 |      |
| CTBP1-AS                  | NONHSAT094692  | 0.273          | 1.123          | 4  | 1244046   | 1249698   | Positive | 1 | 5652 | -0.032 | [7]  |
| CYP4A22-AS1               | NONHSAT003050  | Not detectable | IU             | 1  | 47562324  | 47644943  | Negative | 4 | 921  | -0.079 | [8]  |
|                           | NONHSAT003054  | ID             | IU             |    | 47638526  | 47640990  |          | 2 | 947  | -0.249 |      |
| Cyrano                    | NONHSAT041921  | ID             | 2.608          | 15 | 41576183  | 4159872   | Positive | 6 | 8797 | -0.074 | [9]  |
|                           | NONHSAT041926  | 0.963          | 0.294          |    | 41576207  | 41577887  |          | 2 | 566  | -0.268 |      |
| DHFR-upstream-transcripts | NONHSAT102417  | ID             | ID             | 5  | 79950178  | 79950765  | Positive | 1 | 587  | -0.337 | [10] |
| DHRS4-AS1                 | NONHSAT035952  | Not detectable | ID             | 14 | 24407939  | 24423392  | Negative | 3 | 2747 | -0.204 | [11] |
|                           | NONHSAT035953  | 0.196          | IU             |    | 24407939  | 24424298  |          | 2 | 2770 | -0.054 |      |
|                           | NONHSAT035955  | ID             | 1.024          |    | 24407939  | 24423406  |          | 2 | 2852 | -0.198 |      |
| DISC2                     | NONHSAT010195  | 0.047          | 0.531          | 1  | 231948705 | 231956006 | Positive | 2 | 7289 | -0.095 | [12] |
| DLEU1                     | NONHSAT033809  | IU             | ID             | 13 | 50656306  | 50964427  | Positive | 2 | 481  | -0.043 | [13] |
|                           | NONHSAT033813  | ID             | Not detectable |    | 50656306  | 51102670  |          | 6 | 1141 | -0.12  |      |
|                           | NONHSAT033815  | IU             | Not detectable |    | 50656306  | 51102200  |          | 6 | 982  | -0.087 |      |
|                           | NONHSAT033822  | IU             | Not detectable |    | 50656333  | 50679415  |          | 3 | 991  | -0.386 |      |
|                           | NONHSAT033823  | Not detectable | ID             |    |           |           |          |   |      |        |      |
| NONHSAT033850             | Not detectable | IU             |                |    |           |           |          |   |      |        |      |

|        |               |       |                |    |           |           |          |    |       |        |      |
|--------|---------------|-------|----------------|----|-----------|-----------|----------|----|-------|--------|------|
| DLEU2  | NONHSAT033771 | 0.326 | 0.481          | 13 | 50526410  | 50570895  | Negative | 3  | 22622 | -0.086 | [14] |
|        | NONHSAT033774 | ID    | Not detectable |    | 50530842  | 50562398  |          | 3  | 409   | -0.173 |      |
|        | NONHSAT033780 | 0.096 | 0.171          |    | 50557996  | 50561191  |          | 5  | 1711  | -0.378 |      |
|        | NONHSAT033788 | 4.322 | 0.409          |    | 50601279  | 50603690  |          | 2  | 540   | -0.099 |      |
|        | NONHSAT033796 | IU    | IU             |    | 50618522  | 50656128  |          | 4  | 699   | -0.284 |      |
|        | NONHSAT033798 | 2.166 | 0.273          |    | 50618650  | 50656108  |          | 6  | 705   | -0.058 |      |
|        | NONHSAT033800 | ID    | 0.346          |    | 50623108  | 50623337  |          | 1  | 229   | -0.628 |      |
|        | NONHSAT033805 | 0.103 | 0.607          |    | 50623325  | 50656114  |          | 4  | 791   | -0.058 |      |
| EGO    | NONHSAT087635 | 1.409 | IU             | 3  | 4790875   | 4793274   | Negative | 2  | 1464  | -0.071 | [15] |
|        | NONHSAT087634 | 5.779 | 0.682          |    | 4789857   | 4793258   |          | 3  | 1824  | -0.074 |      |
| GAS5   | NONHSAT007665 | IU    | 0.682          | 1  | 173833038 | 173837129 |          | 12 | 660   | -0.134 | [16] |
|        | NONHSAT007698 | 1.435 | 4.100          |    | 173834955 | 173837125 |          | 3  | 1060  | -0.17  |      |
|        | NONHSAT007699 | 0.181 | 0.976          |    |           |           |          |    |       |        |      |
| Gomafu | NONHSAT084541 | 0.240 | 0.455          | 22 | 27068767  | 27174598  | Positive | 5  | 760   | -0.226 | [17] |
|        | NONHSAT084545 | ID    | 1.365          |    | 27089720  | 27176138  |          | 5  | 691   | -0.037 |      |
|        | NONHSAT084547 | ID    | ID             |    | 27113331  | 27118135  |          | 3  | 706   | -0.108 |      |
|        | NONHSAT084548 | 1.446 | ID             |    | 27122619  | 27174541  |          | 4  | 451   | -0.024 |      |
|        | NONHSAT084549 | 0.412 | ID             |    | 27130460  | 27134094  |          | 2  | 717   | -0.458 |      |
|        | NONHSAT084551 | 0.180 | 0.684          |    | 27172742  | 27176974  |          | 3  | 1433  | -0.037 |      |
| H19    | NONHSAT017460 | 0.273 | 0.152          | 11 | 2016405   | 2018447   | Negative | 4  | 1771  | -0.139 | [18] |
|        | NONHSAT017461 | 0.720 | 0.275          |    | 2016405   | 2022940   |          | 6  | 2767  | -0.132 |      |
|        | NONHSAT017462 | 1.832 | 0.152          |    | 2016405   | 2019044   |          | 5  | 2281  | -0.131 |      |
|        | NONHSAT017465 | 1.306 | 0.189          |    | 2016405   | 2019105   |          | 5  | 2348  | -0.131 |      |
|        | NONHSAT017466 | 2.880 | 0.080          |    | 2016407   | 2019072   |          | 6  | 2090  | -0.128 |      |

|          |               |                |       |    |          |          |          |    |       |        |      |
|----------|---------------|----------------|-------|----|----------|----------|----------|----|-------|--------|------|
|          | NONHSAT017467 | 0.287          | 0.427 |    | 2016439  | 2019027  |          | 3  | 1796  | -0.087 |      |
|          | NONHSAT017469 | 0.992          | 0.303 |    | 2016463  | 2018255  |          | 5  | 1444  | -0.21  |      |
|          | NONHSAT017471 | 1.801          | 0.122 |    | 2016466  | 2019045  |          | 6  | 1481  | -0.153 |      |
|          | NONHSAT017472 | 2.888          | ID    |    | 2016668  | 2017801  |          | 4  | 861   | -0.059 |      |
|          | NONHSAT017474 | 1.006          | 0.157 |    | 2016917  | 2017697  |          | 4  | 524   | -0.068 |      |
| HOTAIRM1 | NONHSAT119664 | 7.203          | 0.907 | 7  | 27135712 | 27139877 | Positive | 3  | 1044  | -0.159 | [19] |
|          | NONHSAT119665 | 0.250          | 2.042 |    | 27135712 | 27139877 |          | 2  | 775   | -0.138 |      |
|          | NONHSAT119666 | 10.453         | 4.058 |    | 27139237 | 27139884 |          | 1  | 647   | -0.003 |      |
|          | NONHSAT119667 | 2.488          | 0.114 |    | 27138457 | 27139758 |          | 2  | 889   | -0.101 |      |
| Hoxa11as | NONHSAT119711 | ID             | 0.341 | 7  | 27227692 | 27228912 | Positive | 1  | 1220  | -0.111 | [20] |
| IPW      | NONHSAT041066 | 0.960          | 0.328 | 15 | 25362618 | 25418143 | Positive | 6  | 513   | -0.238 | [21] |
|          | NONHSAT040981 | 0.607          | 0.318 |    | 25243100 | 25265957 |          | 8  | 1677  | -0.026 |      |
|          | NONHSAT040985 | 0.450          | 0.168 |    | 25245388 | 25271779 |          | 6  | 6860  | -0.183 |      |
|          | NONHSAT040986 | ID             | 0.340 |    | 25245451 | 25265972 |          | 4  | 470   | -0.026 |      |
|          | NONHSAT040988 | 0.324          | 0.433 |    | 25223730 | 25664609 |          | 4  | 17889 | -0.083 |      |
|          | NONHSAT040989 | 0.332          | 0.430 |    | 25261086 | 25281638 |          | 5  | 14547 | -0.083 |      |
|          | NONHSAT040990 | 0.276          | IU    |    | 25264181 | 25299063 |          | 5  | 552   | -0.31  |      |
|          | NONHSAT040991 | 0.456          | 0.303 |    | 25264971 | 25281638 |          | 3  | 14289 | -0.083 |      |
|          | NONHSAT041000 | 0.571          | 0.334 |    | 25295778 | 25367623 |          | 33 | 7844  | -0.08  |      |
|          | NONHSAT041004 | 0.227          | 0.263 |    | 25299013 | 25360804 |          | 32 | 4686  | -0.056 |      |
|          | NONHSAT041006 | Not detectable | IU    |    | 25299859 | 25300392 |          | 2  | 430   | -0.075 |      |
|          | NONHSAT041023 | 1.693          | 0.321 |    | 25322012 | 25328606 |          | 5  | 694   | -0.053 |      |
|          | NONHSAT041028 | 0.549          | 0.259 |    | 25326300 | 25359074 |          | 17 | 8842  | -0.112 |      |
|          | NONHSAT041047 | 0.297          | 0.502 |    | 25340607 | 25364501 |          | 18 | 2892  | -0.202 |      |
|          | NONHSAT041054 | ID             | 0.685 |    | 25354133 | 25354551 |          | 1  | 418   | -0.874 |      |
|          | NONHSAT041057 | 0.720          | 0.339 |    | 25354698 | 25364507 |          | 6  | 1166  | -0.218 |      |
|          | NONHSAT041060 | ID             | IU    |    | 25355629 | 25362629 |          | 4  | 615   | -0.1   |      |

|                |               |       |                |    |           |           |          |    |      |        |      |
|----------------|---------------|-------|----------------|----|-----------|-----------|----------|----|------|--------|------|
|                | NONHSAT041061 | 2.161 | 0.273          |    | 25360161  | 25364575  |          | 4  | 1224 | -0.006 |      |
|                | NONHSAT041062 | 1.409 | 0.273          |    | 25360387  | 25365051  |          | 4  | 1477 | -0.204 |      |
|                | NONHSAT041064 | ID    | 0.409          |    | 25362274  | 25366068  |          | 3  | 2357 | -0.127 |      |
|                | NONHSAT041065 | ID    | ID             |    | 25362556  | 25420017  |          | 7  | 631  | -0.115 |      |
|                | NONHSAT041140 | ID    | ID             |    | 25580243  | 25584406  |          | 2  | 1397 | -0.245 |      |
| Jpx            | NONHSAT137572 | 0.899 | 3.066          | X  | 73164177  | 73219338  |          | 4  | 829  | -0.146 | [22] |
|                | NONHSAT137582 | 0.248 | 0.337          |    | 73207975  | 73216331  |          | 1  | 8356 | -0.016 |      |
|                | NONHSAT137583 | 0.283 | 0.498          |    | 73218247  | 73224818  |          | 2  | 1146 | -0.852 |      |
| LINC00568      | NONHSAT006301 | ID    | Not detectable | 1  | 150488232 | 150490508 |          | 2  | 566  | -0.103 | [8]  |
| LUCAT1         | NONHSAT102744 | 9.080 | 1.024          | 5  | 90598757  | 90609474  |          | 5  | 8403 | -0.074 | [23] |
|                | NONHSAT102748 | 2.300 | 0.227          |    | 90603570  | 90610185  |          | 4  | 3860 | -0.036 |      |
|                | NONHSAT102749 | 3.356 | 2.040          |    | 90603570  | 90610185  |          | 4  | 5241 | -0.085 |      |
|                | NONHSAT102750 | 2.952 | IU             |    | 90606276  | 90609354  |          | 3  | 1234 | -0.08  |      |
| linc00467      | NONHSAT009289 | ID    | 0.171          | 1  | 211556096 | 211605877 |          | 6  | 758  | -0.036 | [24] |
|                | NONHSAT009290 | 0.360 | IU             |    | 211556144 | 211570206 |          | 5  | 429  | -0.047 |      |
|                | NONHSAT009291 | 0.404 | 0.121          |    | 211556157 | 211572206 |          | 5  | 1236 | -0.015 |      |
|                | NONHSAT009292 | 0.288 | 0.677          |    | 211556161 | 211605911 |          | 7  | 1005 | -0.038 |      |
|                | NONHSAT009293 | ID    | Not detectable |    | 211556178 | 211565318 |          | 4  | 478  | -0.06  |      |
|                | NONHSAT009294 | IU    | IU             |    | 211564980 | 211606029 |          | 4  | 651  | -0.028 |      |
| lincRNA-SFMBT2 | NONHSAT011261 | ID    | IU             | 10 | 6821595   | 6859059   | Positive | 3  | 486  | -0.184 | [25] |
| lincRNA-VLDLR  | NONHSAT129994 | ID    | IU             | 9  | 2422701   | 2621413   | Negative | 11 | 3167 | -0.187 | [25] |
|                | NONHSAT129993 | ID    | Not detectable |    | 2422701   | 2621413   |          | 11 | 3108 | -0.187 |      |
|                | NONHSAT130003 | 0.710 | 4.463          |    | 2622089   | 2641395   |          | 4  | 447  | -0.07  |      |

|             |               |       |                |    |           |           |          |   |       |        |      |
|-------------|---------------|-------|----------------|----|-----------|-----------|----------|---|-------|--------|------|
| lncRNA-HEIH | NONHSAT105843 | 0.313 | 1.384          | 5  | 180256968 | 180258971 | Positive | 2 | 1497  | -0.15  | [26] |
| MEG3        | NONHSAT039734 | 0.289 | 0.339          | 14 | 101245746 | 101295533 | Positive | 3 | 632   | -0.064 | [27] |
|             | NONHSAT039762 | IU    | 0.682          |    | 101295637 | 101302637 |          | 2 | 2368  | -0.153 |      |
|             | NONHSAT039768 | 1.801 | IU             |    | 101298102 | 101312239 |          | 4 | 4351  | -0.13  |      |
|             | NONHSAT039771 | 0.360 | IU             |    | 101299614 | 101313638 |          | 2 | 4867  | -0.127 |      |
|             | NONHSAT039774 | ID    | 0.546          |    | 101301862 | 101327153 |          | 5 | 721   | -0.087 |      |
|             | NONHSAT039776 | ID    | Not detectable |    | 101302142 | 101327096 |          | 5 | 465   | -0.237 |      |
| MEG9        | NONHSAT039999 | IU    | 2.052          | 14 | 101536247 | 101539273 | Positive | 2 | 2640  | -0.164 | [28] |
|             | NONHSAT040000 | IU    | Not detectable |    | 101536789 | 101539274 |          | 2 | 742   | -0.042 |      |
|             | NONHSAT040003 | IU    | Not detectable |    | 101538143 | 101538895 |          | 2 | 385   | -0.113 |      |
| NEAT1       | NONHSAT022109 | IU    | 0.682          | 11 | 65185942  | 65217564  | Positive | 2 | 31379 | -0.018 | [29] |
|             | NONHSAT022112 | 0.327 | 0.318          |    | 65190268  | 65213011  |          | 1 | 22743 | -0.205 |      |
|             | NONHSAT022113 | 0.363 | 0.307          |    | 65190268  | 65207625  |          | 1 | 17357 | -0.053 |      |
| NRON        | NONHSAT134764 | 0.034 | 0.158          | 9  | 129170053 | 129172783 | Negative | 1 | 2730  | -0.018 | [30] |
| NTT         | NONHSAT115106 | 0.102 | 0.231          | 6  | 136265388 | 136282959 | Positive | 2 | 17566 | -0.032 | [31] |
| Nespas      | NONHSAT080575 | 0.240 | IU             | 20 | 57392058  | 57402863  | Negative | 4 | 2401  | -0.081 | [32] |
|             | NONHSAT080583 | 0.290 | 0.268          |    | 57405764  | 57414772  |          | 2 | 8886  | -0.165 |      |
|             | NONHSAT080588 | 0.328 | 0.379          |    | 57416990  | 57425958  |          | 1 | 8968  | -0.059 |      |
| ncR-uPAR    | NONHSAT102246 | ID    | 0.626          | 5  | 76007762  | 76008686  | Positive | 1 | 924   | -0.018 | [33] |

|               |               |       |                |           |           |           |          |        |      |        |      |
|---------------|---------------|-------|----------------|-----------|-----------|-----------|----------|--------|------|--------|------|
| PDZK1IP1-AS1  | NONHSAT003057 | ID    | 2.047          | 1         | 47644219  | 47646045  | Positive | 2      | 1400 | -0.183 | [8]  |
| PRINS         | NONHSAT011776 | IU    | ID             | 10        | 24536050  | 24544975  | Positive | 2      | 2195 | -0.04  | [34] |
| PVT1          | NONHSAT129050 | 0.723 | ID             | 8         | 128806802 | 128867565 | Positive | 3      | 458  | -0.543 | [35] |
|               | NONHSAT129049 | 0.949 | 0.321          |           | 128806799 | 129113502 |          | 18     | 5132 | -0.08  |      |
|               | NONHSAT129052 | 1.435 | ID             |           | 128806805 | 128951855 |          | 3      | 392  | -0.534 |      |
|               | NONHSAT129054 | 1.151 | 0.105          |           | 128807999 | 128903178 |          | 2      | 599  | -0.203 |      |
|               | NONHSAT129055 | 4.167 | ID             |           | 128808058 | 128903041 |          | 3      | 568  | -0.106 |      |
|               | NONHSAT129056 | 2.397 | 0.273          |           | 128808065 | 128903206 |          | 2      | 624  | -0.157 |      |
|               | NONHSAT129064 | 2.881 | 0.194          |           | 128902922 | 129008896 |          | 3      | 542  | -0.071 |      |
|               | NONHSAT129072 | 0.241 | Not detectable |           | 128996418 | 129007177 |          | 3      | 211  | -0.182 |      |
|               | NONHSAT129074 | ID    | 0.677          |           | 129001462 | 129108824 |          | 4      | 408  | -0.051 |      |
|               | NONHSAT129085 | 0.243 | 0.346          |           | 129094932 | 129113503 |          | 3      | 577  | -0.015 |      |
| NONHSAT129088 | 0.720         | IU    |                | 129103339 | 129113488 | 4         | 864      | -0.084 |      |        |      |
| Rian          | NONHSAT039799 | 2.081 | 0.264          | 14        | 101361001 | 101362601 | Positive | 1      | 1600 | -0.02  | [29] |
| SENCR         | NONHSAT025072 | 3.927 | 1.368          | 11        | 128561566 | 128565918 | Negative | 3      | 1298 | -0.151 | [36] |
| SNHG1         | NONHSAT021843 | 4.564 | 1.500          | 11        | 62620543  | 62621814  | Negative | 3      | 625  | -0.273 | [17] |
|               | NONHSAT021847 | 0.349 | 3.829          |           | 62621018  | 62622951  |          | 6      | 532  | -0.055 |      |
|               | NONHSAT021853 | IU    | 1.365          |           | 62621839  | 62622960  |          | 3      | 578  | -0.237 |      |
| SNHG5         | NONHSAT113851 | 3.596 | 0.547          | 6         | 86375569  | 86388438  | Negative | 4      | 1029 | -0.442 | [37] |
|               | NONHSAT113863 | ID    | 0.682          |           | 86386845  | 86388451  |          | 3      | 998  | -0.425 |      |
| ST7OT         | NONHSAT122922 | ID    | ID             | 7         | 116712125 | 116714778 | Negative | 4      | 1124 | -0.003 | [38] |

|      |               |       |       |    |           |           |          |   |      |        |      |
|------|---------------|-------|-------|----|-----------|-----------|----------|---|------|--------|------|
|      | NONHSAT122927 | ID    | ID    |    | 116785418 | 116786534 |          | 2 | 592  | -0.433 |      |
| TUG1 | NONHSAT084838 | 0.241 | 0.340 | 22 | 31368248  | 31375377  | Positive | 2 | 5561 | -0.041 | [39] |

---

Definition of abbreviations:

CNCI: coding and non-coding indexes.

ID: Infinite time down-regulation (Zero reads from the LPS treatment, but control sample has reads)

IU: Infinite time up-regulation (Zero reads from the control sample, but sample from LPS treatment has reads)

## References

- [1] J. Yao, B. Zhou, J. Zhang, et al., "A new tumor suppressor LncRNA ADAMTS9-AS2 is regulated by DNMT1 and inhibits migration of glioma cells," *Tumour Biology : The Journal of the International Society for Oncodevelopmental Biology and Medicine*, vol.35, no. 8, pp. 7935-44, 2014.
- [2] M. N. Cabili, C. Trapnell, L. Goff, et al., "Integrative annotation of human large intergenic noncoding RNAs reveals global properties and specific subclasses," *Genes and Development*, vol.25, no. 18, pp. 1915-27, 2011.
- [3] W. Deng, J. Wang, J. Zhang, et al., "TET2 regulates LncRNA-ANRIL expression and inhibits the growth of human gastric cancer cells," *IUBMB Life*, vol.68, no. 5, pp. 355-64, 2016.
- [4] L. Chen, W. Wang, L. Cao, et al., "Long Non-Coding RNA CCAT1 Acts as a Competing Endogenous RNA to Regulate Cell Growth and Differentiation in Acute Myeloid Leukemia," *Molecules and Cells*, vol.39, no. 4, pp. 330-6, 2016.
- [5] S. Memczak, M. Jens, A. Elefsinioti, et al., "Circular RNAs are a large class of animal RNAs with regulatory potency," *Nature*, vol.495, no. 7441, pp. 333-8, 2013.
- [6] B. C. Ellis, P. L. Molloy, and L. D. Graham, "CRNDE: A Long Non-Coding RNA Involved in Cancer, Neurobiology, and Development," *Frontiers in Genetics*, vol.3, no., pp. 270, 2012.
- [7] K. Takayama, K. Horie-Inoue, S. Katayama, et al., "Androgen-responsive long noncoding RNA CTBP1-AS promotes prostate cancer," *The EMBO Journal*, vol.32, no. 12, pp. 1665-80, 2013.
- [8] U. A. Orom, T. Derrien, M. Beringer, et al., "Long noncoding RNAs with enhancer-like function in human cells," *Cell*, vol.143, no. 1, pp. 46-58, 2010.
- [9] I. Ulitsky, A. Shkumatava, C. H. Jan, et al., "Conserved function of lincRNAs in vertebrate embryonic development despite rapid sequence evolution," *Cell*, vol.147, no. 7, pp. 1537-50, 2011.



- [10] I. Martianov, A. Ramadass, A. Serra Barros, et al., "Repression of the human dihydrofolate reductase gene by a non-coding interfering transcript," *Nature*, vol.445, no. 7128, pp. 666-70, 2007.
- [11] Q. Li, Z. Su, X. Xu, et al., "AS1DHRS4, a head-to-head natural antisense transcript, silences the DHRS4 gene cluster in cis and trans," *Proceedings of the National Academy of Sciences of the United States of America*, vol.109, no. 35, pp. 14110-5, 2012.
- [12] J. K. Millar, J. C. Wilson-Annan, S. Anderson, et al., "Disruption of two novel genes by a translocation co-segregating with schizophrenia," *Human Molecular Genetics*, vol.9, no. 9, pp. 1415-23, 2000.
- [13] A. Garding, N. Bhattacharya, R. Claus, et al., "Epigenetic upregulation of lncRNAs at 13q14.3 in leukemia is linked to the In Cis downregulation of a gene cluster that targets NF-kB," *PLoS Genetics*, vol.9, no. 4, pp. e1003373, 2013.
- [14] M. Lerner, M. Harada, J. Loven, et al., "DLEU2, frequently deleted in malignancy, functions as a critical host gene of the cell cycle inhibitory microRNAs miR-15a and miR-16-1," *Experimental Cell Research*, vol.315, no. 17, pp. 2941-52, 2009.
- [15] L. A. Wagner, C. J. Christensen, D. M. Dunn, et al., "EGO, a novel, noncoding RNA gene, regulates eosinophil granule protein transcript expression," *Blood*, vol.109, no. 12, pp. 5191-8, 2007.
- [16] M. Mourtada-Maarabouni, A. M. Hasan, F. Farzaneh, et al., "Inhibition of human T-cell proliferation by mammalian target of rapamycin (mTOR) antagonists requires noncoding RNA growth-arrest-specific transcript 5 (GAS5)," *Molecular Pharmacology*, vol.78, no. 1, pp. 19-28, 2010.
- [17] T. R. Mercer, I. A. Qureshi, S. Gokhan, et al., "Long noncoding RNAs in neuronal-glia fate specification and oligodendrocyte lineage maturation," *BMC Neuroscience*, vol.11, no., pp. 14, 2010.

- [18] A. Gabory, H. Jammes, and L. Dandolo, "The H19 locus: role of an imprinted non-coding RNA in growth and development," *BioEssays : News and Reviews in Molecular, Cellular and Developmental Biology*, vol.32, no. 6, pp. 473-80, 2010.
- [19] X. Zhang, Z. Lian, C. Padden, et al., "A myelopoiesis-associated regulatory intergenic noncoding RNA transcript within the human HOXA cluster," *Blood*, vol.113, no. 11, pp. 2526-34, 2009.
- [20] H. M. Hsieh-Li, D. P. Witte, M. Weinstein, et al., "Hoxa 11 structure, extensive antisense transcription, and function in male and female fertility," *Development*, vol.121, no. 5, pp. 1373-85, 1995.
- [21] J. Rachmilewitz, M. Elkin, L. H. Looijenga, et al., "Characterization of the imprinted IPW gene: allelic expression in normal and tumorigenic human tissues," *Oncogene*, vol.13, no. 8, pp. 1687-92, 1996.
- [22] C. Chureau, M. Prissette, A. Bourdet, et al., "Comparative sequence analysis of the X-inactivation center region in mouse, human, and bovine," *Genome Research*, vol.12, no. 6, pp. 894-908, 2002.
- [23] P. Thai, S. Statt, C. H. Chen, et al., "Characterization of a novel long noncoding RNA, SCAL1, induced by cigarette smoke and elevated in lung cancer cell lines," *American Journal of Respiratory Cell and Molecular Biology*, vol.49, no. 2, pp. 204-11, 2013.
- [24] B. Atmadibrata, P. Y. Liu, N. Sokolowski, et al., "The novel long noncoding RNA linc00467 promotes cell survival but is down-regulated by N-Myc," *PloS One*, vol.9, no. 2, pp. e88112, 2014.
- [25] S. Loewer, M. N. Cabili, M. Guttman, et al., "Large intergenic non-coding RNA-RoR modulates reprogramming of human induced pluripotent stem cells," *Nature Genetics*, vol.42, no. 12, pp. 1113-7, 2010.

- [26] F. Yang, L. Zhang, X. S. Huo, et al., "Long noncoding RNA high expression in hepatocellular carcinoma facilitates tumor growth through enhancer of zeste homolog 2 in humans," *Hepatology*, vol.54, no. 5, pp. 1679-89, 2011.
- [27] X. Zhang, Y. Zhou, K. R. Mehta, et al., "A pituitary-derived MEG3 isoform functions as a growth suppressor in tumor cells," *The Journal of Clinical Endocrinology and Metabolism*, vol.88, no. 11, pp. 5119-26, 2003.
- [28] J. P. Hagan, B. L. O'Neill, C. L. Stewart, et al., "At least ten genes define the imprinted Dlk1-Dio3 cluster on mouse chromosome 12qF1," *PloS One*, vol.4, no. 2, pp. e4352, 2009.
- [29] M. Guttman, J. Donaghey, B. W. Carey, et al., "lincRNAs act in the circuitry controlling pluripotency and differentiation," *Nature*, vol.477, no. 7364, pp. 295-300, 2011.
- [30] A. T. Willingham, A. P. Orth, S. Batalov, et al., "A strategy for probing the function of noncoding RNAs finds a repressor of NFAT," *Science*, vol.309, no. 5740, pp. 1570-3, 2005.
- [31] A. Y. Liu, B. S. Torchia, B. R. Migeon, et al., "The human NTT gene: identification of a novel 17-kb noncoding nuclear RNA expressed in activated CD4+ T cells," *Genomics*, vol.39, no. 2, pp. 171-84, 1997.
- [32] S. Chillambhi, S. Turan, D. Y. Hwang, et al., "Deletion of the noncoding GNAS antisense transcript causes pseudohypoparathyroidism type Ib and biparental defects of GNAS methylation in cis," *The Journal of Clinical Endocrinology and Metabolism*, vol.95, no. 8, pp. 3993-4002, 2010.
- [33] N. R. Madamanchi, Z. Y. Hu, F. Li, et al., "A noncoding RNA regulates human protease-activated receptor-1 gene during embryogenesis," *Biochimica et Biophysica Acta*, vol.1576, no. 3, pp. 237-45, 2002.

- [34] E. Sonkoly, Z. Bata-Csorgo, A. Pivarcsi, et al., "Identification and characterization of a novel, psoriasis susceptibility-related noncoding RNA gene, PRINS," *The Journal of Biological Chemistry*, vol.280, no. 25, pp. 24159-67, 2005.
- [35] W. J. Cao, H. L. Wu, B. S. He, et al., "Analysis of long non-coding RNA expression profiles in gastric cancer," *World Journal of Gastroenterology*, vol.19, no. 23, pp. 3658-64, 2013.
- [36] R. D. Bell, X. Long, M. Lin, et al., "Identification and initial functional characterization of a human vascular cell-enriched long noncoding RNA," *Arteriosclerosis, Thrombosis, and Vascular Biology*, vol.34, no. 6, pp. 1249-59, 2014.
- [37] R. Tanaka, H. Satoh, M. Moriyama, et al., "Intronic U50 small-nucleolar-RNA (snoRNA) host gene of no protein-coding potential is mapped at the chromosome breakpoint t(3;6)(q27;q15) of human B-cell lymphoma," *Genes to Cells : Devoted to Molecular & Cellular Mechanisms*, vol.5, no. 4, pp. 277-87, 2000.
- [38] J. L. Vincent, D. R. Nelson, and M. D. Williams, "Is worsening multiple organ failure the cause of death in patients with severe sepsis?," *Critical Care Medicine*, vol.39, no. 5, pp. 1050-5, 2011.
- [39] A. M. Khalil, M. Guttman, M. Huarte, et al., "Many human large intergenic noncoding RNAs associate with chromatin-modifying complexes and affect gene expression," *Proceedings of the National Academy of Sciences of the United States of America*, vol.106, no. 28, pp. 11667-72, 2009.

**Supplementary Table 3:** Expression of Protein coding genes (PCGs) overlapping with functionally annotated lncRNAs at 3 and 24 h LPS treatment in human microvascular endothelial cells (HMECs).

| Functionally annotated lncRNAs | Overlapping regulatory NONCODE splice variants                                                                         | Class                | PCG          | Fold regulation of PCG (3 h) | Fold regulation of PCG (24 h) |
|--------------------------------|------------------------------------------------------------------------------------------------------------------------|----------------------|--------------|------------------------------|-------------------------------|
| ADAMTS9-AS2                    | NONHSAT090266, NONHSAT090274                                                                                           | Antisense            | ADAMTS9      | <b>0.327</b>                 | 0.950                         |
| ANRIL                          | NONHSAT130413, NONHSAT130414, NONHSAT130416, NONHSAT130417, NONHSAT130422, NONHSAT130423, NONHSAT130425, NONHSAT130433 | Antisense            | CDKN2B       | <b>0.327</b>                 | 0.950                         |
| CCAT1                          | NONHSAT129019                                                                                                          | Antisense            | POU5F1B      | ND                           | ND                            |
| CDR1-AS                        | NONHSAT138820                                                                                                          | Antisense            | CDR1         | 0.654                        | 2.036                         |
| CYP4A22-AS1                    | NONHSAT003050, NONHSAT003054                                                                                           | Antisense            | CYP4A22      | ND                           | ND                            |
| Cyrano                         | NONHSAT041921, NONHSAT041926                                                                                           | Antisense            | OIP5         | 0.751                        | 1.029                         |
| DHFR-upstream-transcripts      | NONHSAT102417                                                                                                          | Antisense;<br>Exonic | MSH3<br>DHFR | 0.618<br>ND                  | 1.050<br>ND                   |

|           |                                                                                                                                                                                                                                                                                                                                                                       |           |                           |                                |                         |
|-----------|-----------------------------------------------------------------------------------------------------------------------------------------------------------------------------------------------------------------------------------------------------------------------------------------------------------------------------------------------------------------------|-----------|---------------------------|--------------------------------|-------------------------|
| DHRS4-AS1 | NONHSAT035952, NONHSAT035953,<br>NONHSAT035955                                                                                                                                                                                                                                                                                                                        | Antisense | DHRS4L2<br>DHRS4          | 1.059<br>0.981                 | 1.134<br>0.898          |
| DISC2     | NONHSAT010195                                                                                                                                                                                                                                                                                                                                                         | Exonic    | DISC1                     | 0.529                          | 1.215                   |
| DLEU1     | NONHSAT033809, NONHSAT033813,<br>NONHSAT033815, NONHSAT033822,<br>NONHSAT033823, NONHSAT033850                                                                                                                                                                                                                                                                        | Antisense | DLEU7                     | ND                             | ND                      |
| DLEU2     | NONHSAT033771, NONHSAT033774,<br>NONHSAT033780, NONHSAT033788,<br>NONHSAT033796, NONHSAT033798<br>NONHSAT033800, NONHSAT033805                                                                                                                                                                                                                                        | Antisense | KCNRG<br>TRIM13<br>SPRYD7 | <b>0.268</b><br>0.617<br>0.548 | 1.901<br>1.490<br>0.839 |
| EGO       | NONHSAT087635, NONHSAT087634                                                                                                                                                                                                                                                                                                                                          | Antisense | ITPR1                     | 0.818                          | 1.444                   |
| GAS5      | NONHSAT007665, NONHSAT007698,<br>NONHSAT007698                                                                                                                                                                                                                                                                                                                        | Antisense | ZBTB37                    | 0.601                          | 1.370                   |
| Hoxa11as  | NONHSAT119711                                                                                                                                                                                                                                                                                                                                                         | Antisense | hoxa11a                   | <b>0.274</b>                   | 0.839                   |
| IPW       | NONHSAT041066, NONHSAT040981,<br>NONHSAT040985, NONHSAT040986,<br>NONHSAT040988, NONHSAT040989<br>NONHSAT040990, NONHSAT040991,<br>NONHSAT041000, NONHSAT041004,<br>NONHSAT041006, NONHSAT041023,<br>NONHSAT041028, NONHSAT041047,<br>NONHSAT041054, NONHSAT041057,<br>NONHSAT041060, NONHSAT041061,<br>NONHSAT041062, NONHSAT041064,<br>NONHSAT041065, NONHSAT041140 | Antisense | UBE3A                     | ND                             | ND                      |

|               |                                                |                    |          |              |       |
|---------------|------------------------------------------------|--------------------|----------|--------------|-------|
| lincRNA-VLDLR | NONHSAT129994, NONHSAT129993,<br>NONHSAT130003 | Antisense          | VLDLR    | 0.461        | 0.557 |
| NRON          | NONHSAT134764                                  | Antisense          | MVB12B   | 0.352        | 1.808 |
| NTT           | NONHSAT115106                                  | Exonic             | PDE7B    | <b>0.068</b> | ND    |
| Nespas        | NONHSAT080575, NONHSAT080583,<br>NONHSAT080588 | Antisense          | GNAS     | 0.865        | 1.465 |
| PRINS         | NONHSAT011776                                  | Sense No<br>Exonic | KIAA1217 | 0.654        | 1.742 |
| SENCR         | NONHSAT025072                                  | Antisense          | FLI1     | 1.229        | 1.368 |
| ST7OT         | NONHSAT122922, NONHSAT122927                   | Antisense          | ST7      | 0.695        | 1.014 |

---

Definition of abbreviation:

PCG: Protein coding gene

**Supplementary Table 4: Significant canonical pathways and associated differentially regulated protein coding genes (PCGs) at 3 h in human microvascular endothelial cells (HMECs) after LPS treatment.**

| Ingenuity Canonical Pathways                                                   | PCGs involved                                                                                          |
|--------------------------------------------------------------------------------|--------------------------------------------------------------------------------------------------------|
| Granulocyte Adhesion and Diapedesis                                            | CXCL8,IL1A,VCAM1,ICAM1,MMP3,CCL20,SDC4,CCL5,CCL11,HRH1,CXCL3,CCL2,IL1B,CXCL1,TNFRSF11B                 |
| Role of Macrophages, Fibroblasts and Endothelial Cells in Rheumatoid Arthritis | CXCL8,VCAM1,IL1A,ICAM1,MMP3,FGF2,IL32,VEGFC,IL6,CCL5,TLR2,JUN,NFKBIA,CCL2,IL1B,FZD5,TNFSF13B,TNFRSF11B |
| Agranulocyte Adhesion and Diapedesis                                           | CXCL8,IL1A,VCAM1,ICAM1,MMP3,CCL20,SDC4,CCL5,CCL11,HRH1,CXCL3,CCL2,IL1B,CXCL1                           |
| Atherosclerosis Signaling                                                      | CXCL8,IL1A,VCAM1,ICAM1,CCL2,MMP3,CD40,IL1B,IL6,CCL11,F3                                                |
| Glucocorticoid Receptor Signaling                                              | CXCL8,VCAM1,ICAM1,SMAD3,CCL5,IL6,CCL11,CXCL3,NFKBIA,JUN,CCL2,IL1B,PTGS,PLAU,SERPINE1                   |
| Role of IL-17A in Arthritis                                                    | CXCL8,CXCL3,NFKBIA,CCL2,CCL20,CXCL1,CCL5,PTGS2                                                         |
| Activation of IRF by Cytosolic Pattern Recognition Receptors                   | IFIH1,JUN,NFKBIA,CD40,IL6,ISG15                                                                        |
| Role of Hypercytokinemia/hyperchemokineemia in the Pathogenesis of Influenza   | CXCL8,IL1A,CCL2,IL1B,CCL5,IL6                                                                          |
| IL-17 Signaling                                                                | CXCL8,JUN,CCL2,MMP3,CXCL1,PTGS2,IL6,CCL11                                                              |
| Role of IL-17A in Psoriasis                                                    | CXCL8,CXCL3,CCL20,CXCL1                                                                                |



|                                                                                                       |                                                                                          |
|-------------------------------------------------------------------------------------------------------|------------------------------------------------------------------------------------------|
| Death Receptor Signaling                                                                              | NFKBIA,TNFRSF10B,TNFSF10,TNFSF15,CFLAR,BIRC3,BIRC2                                       |
| HMGB1 Signaling                                                                                       | CXCL8,IL1A,VCAM1,ICAM1,JUN,CCL2,IL1B,IL6,SERPINE1,TNFRSF11B                              |
| Hepatic Fibrosis / Hepatic Stellate Cell Activation                                                   | CXCL8,IL1A,VCAM1,ICAM1,FGF2,SMAD3,VEGFC,IL6,CCL5,CXCL3,CD40,CCL2,IL1B,SERPINE1,TNFRSF11B |
| Differential Regulation of Cytokine Production in Macrophages and T Helper Cells by IL-17A and IL-17F | CCL2,IL1B,CXCL1,CCL5,IL6                                                                 |
| TNFR2 Signaling                                                                                       | JUN,NFKBIA,BIRC3,BIRC2                                                                   |
| TREM1 Signaling                                                                                       | TLR2,CXCL8,CXCL3,ICAM1,CCL2,CD40,IL1B,IL6                                                |
| Differential Regulation of Cytokine Production in Intestinal Epithelial Cells by IL-17A and IL-17F    | IL1A,CCL2,IL1B,CXCL1,CCL5                                                                |
| Communication between Innate and Adaptive Immune Cells                                                | TLR2,CXCL8,IL1A,CD40,IL1B,CCL5,IL6,TNFSF13B                                              |
| Acute Phase Response Signaling                                                                        | IL1A,SOD2,JUN,C3,NFKBIA,IL1B,IL6,SERPINE1,TNFRSF11B                                      |
| Role of Cytokines in Mediating Communication between Immune Cells                                     | CXCL8,IL1A,IL32,IL1B,IL6                                                                 |
| Role of IL-17F in Allergic Inflammatory Airway Diseases                                               | CXCL8,CCL2,IL1B,CXCL1,IL6                                                                |
| TNFR1 Signaling                                                                                       | JUN,NFKBIA,BIRC3,BIRC2                                                                   |
| Dendritic Cell Maturation                                                                             | TLR2,IL1A,ICAM1,NFKBIA,CD40,IL32,IL1B,IL6,TNFRSF11B                                      |
| IL-17A Signaling in Gastric Cells                                                                     | CXCL8,JUN,CCL20,CXCL1,CCL5                                                               |
| IL-17A Signaling in Airway Cells                                                                      | CXCL3,NFKBIA,CCL20,CXCL1,IL6,CCL11                                                       |
| Inflammasome pathway                                                                                  | CXCL8,IL1B,P2RX7                                                                         |

|                                                                              |                                                          |
|------------------------------------------------------------------------------|----------------------------------------------------------|
| Role of Pattern Recognition Receptors in Recognition of Bacteria and Viruses | TLR2,IFIH1,CXCL8,IL1A,C3,IL1B,CCL5,IL6                   |
| IL-6 Signaling                                                               | CXCL8,IL1A,JUN,NFKBIA,IL1B,IL6,TNFRSF11B                 |
| TWEAK Signaling                                                              | NFKBIA,BIRC3,BIRC2                                       |
| Systemic Lupus Erythematosus Signaling                                       | IL1A,JUN,CD40,IL1B,IL6,TNFSF13B                          |
| CD40 Signaling                                                               | ICAM1,JUN,NFKBIA,CD40,PTGS2                              |
| Hepatic Cholestasis                                                          | CXCL8,IL1A,JUN,NFKBIA,IL1B,IL6,TNFRSF11B                 |
| LXR/RXR Activation                                                           | IL1A,C3,CCL2,IL1B,PTGS2,IL6,TNFRSF11B                    |
| Retinoic acid Mediated Apoptosis Signaling                                   | TNFRSF10B,TNFSF10,CFLAR                                  |
| Lymphotoxin $\beta$ Receptor Signaling                                       | VCAM1,NFKBIA,CXCL1,BIRC2                                 |
| IL-17A Signaling in Fibroblasts                                              | JUN,NFKBIA,CCL2,IL6                                      |
| PPAR Signaling                                                               | IL1A,JUN,NFKBIA,IL1B,PTGS2,TNFRSF11B                     |
| Eicosanoid Signaling                                                         | PTGFR,PTGIR,PTGS2,PTGDS,PTGER4                           |
| Hematopoiesis from Pluripotent Stem Cells                                    | CXCL8,IL1A,IL6                                           |
| Altered T Cell and B Cell Signaling in Rheumatoid Arthritis                  | TLR2,IL1A,CD40,IL1B,IL6,TNFSF13B                         |
| Coagulation System                                                           | PLAU,SERPINE1,F3                                         |
| B Cell Activating Factor Signaling                                           | JUN,NFKBIA,TNFSF13B                                      |
| Role of Osteoblasts, Osteoclasts and Chondrocytes in Rheumatoid Arthritis    | IL1A,JUN,NFKBIA,MMP3,IL1B,FZD5,IL6,BIRC3,TNFRSF11B,BIRC2 |
| Induction of Apoptosis by HIV1                                               | NFKBIA,BIRC3,TNFRSF11B,BIRC2                             |

Cholecystokinin/Gastrin-mediated Signaling

IL1A,JUN,IL1B,PTGS2

PI3K Signaling in B Lymphocytes

JUN,C3,NFKBIA,CD40

Toll-like Receptor Signaling

TLR2,IL1A,JUN,NFKBIA,IL1B

---

**Supplementary Table 5: Significant canonical pathways and associated differentially regulated protein coding genes (PCGs) at 24 h in human microvascular endothelial cells (HMECs) after LPS treatment.**

| Ingenuity Canonical Pathways                                                      | Genes involved                                                                                              |
|-----------------------------------------------------------------------------------|-------------------------------------------------------------------------------------------------------------|
| Role of IL-17F in Allergic Inflammatory Airway Diseases                           | CXCL10,CXCL8,IGF1,CCL2,IL1B,CXCL1,CXCL5,IL6,CSF2                                                            |
| Role of IL-17A in Arthritis                                                       | CXCL8,CXCL3,NFKBIA,CCL2,CCL20,CXCL1,CXCL5,CCL5,PTGS2,MMP1                                                   |
| Agranulocyte Adhesion and Diapedesis                                              | AOC3,CXCL8,SELE,IL1A,VCAM1,ICAM1,CXCR4,CCL20,CXCL5,CCL5,CXCL10,CXCL3,CCL2,IL1B,CXCL1, MMP1                  |
| Granulocyte Adhesion and Diapedesis                                               | CXCL8,SELE,IL1A,VCAM1,ICAM1,CXCR4,CCL20,CXCL5,CCL5,CXCL10,CXCL3,CCL2,IL1B,CXCL1, MMP1,TNFRSF11B             |
| Role of IL-17A in Psoriasis<br>Role of                                            | CXCL8,CXCL3,CCL20,CXCL1,CXCL5                                                                               |
| Hypercytokinemia/hyperchemokine-<br>mia in the Pathogenesis of Influenza          | CXCL10,CXCL8,IL1A,CCL2,IL1B,CCL5,IL6                                                                        |
| Role of Macrophages, Fibroblasts and<br>Endothelial Cells in Rheumatoid Arthritis | CXCL8,VCAM1,SELE,IL1A,ICAM1,IL32,VEGFC,IL6,CCL5,NFKBIA,CCL2,IL1B,CSF2,TNFSF13B, LRP1, MMP1,TNFRSF11B,CAMK2B |
| Communication between Innate and<br>Adaptive Immune Cells                         | CXCL10,HLA-G,CXCL8,IL1A,HLA-B,IL1B,CCL5,IL6,CSF2,TNFSF13B                                                   |

|                                                                                                       |                                                                                    |
|-------------------------------------------------------------------------------------------------------|------------------------------------------------------------------------------------|
| Differential Regulation of Cytokine Production in Macrophages and T Helper Cells by IL-17A and IL-17F | CCL2,IL1B,CXCL1,CCL5,IL6,CSF2                                                      |
| HMGB1 Signaling                                                                                       | CXCL8,SELE,IL1A,VCAM1,ICAM1,CCL2,IL1B,IL6,SERPINE1,CSF2,TNFRSF11B                  |
| Differential Regulation of Cytokine Production in Intestinal Epithelial Cells by IL-17A and IL-17F    | IL1A,CCL2,IL1B,CXCL1,CCL5,CSF2                                                     |
| Role of Cytokines in Mediating Communication between Immune Cells                                     | CXCL8,IL1A,IL32,IL1B,IL6,CSF2                                                      |
| Glucocorticoid Receptor Signaling                                                                     | CXCL8,SELE,VCAM1,ICAM1,CCL5,IL6,CXCL3,NFKBIA,CCL2,IL1B,PTGS2,CSF2,SERPINE1,MMP1    |
| Atherosclerosis Signaling                                                                             | CXCL8,SELE,IL1A,VCAM1,ICAM1,CCL2,CXCR4,IL1B,IL6,MMP1                               |
| Retinol Biosynthesis                                                                                  | AKR1C3,LIPG,RBP1                                                                   |
| Hepatic Fibrosis / Hepatic Stellate Cell Activation                                                   | CXCL3,CXCL8,VCAM1,IL1A,ICAM1,CCL2,IGF1,IL1B,VEGFC,CCL5,IL6,SERPINE1,MMP1,TNFRSF11B |
| Acute Phase Response Signaling                                                                        | IL1A,SOD2,C3,NFKBIA,IL1B,IL6,SERPINE1,RBP1,TNFRSF11B                               |
| IL-17 Signaling                                                                                       | CXCL10,CXCL8,CCL2,CXCL1,CXCL5,PTGS2,IL6                                            |
| Graft-versus-Host Disease Signaling                                                                   | HLA-G,IL1A,HLA-B,IL1B,IL6                                                          |
| IL-17A Signaling in Fibroblasts                                                                       | NFKBIA,CCL2,CXCL5,IL6,MMP1                                                         |
| Hematopoiesis from Pluripotent Stem Cells                                                             | CXCL8,IL1A,IL6,CSF2                                                                |
| Dendritic Cell Maturation                                                                             | IL1A,ICAM1,NFKBIA,IL32,HLA-B,IL1B,IL6,CSF2,TNFRSF11B                               |
| TREM1 Signaling                                                                                       | CXCL8,CXCL3,ICAM1,CCL2,IL1B,IL6,CSF2                                               |
| IL-17A Signaling in Gastric Cells                                                                     | CXCL10,CXCL8,CCL20,CXCL1,CCL5                                                      |

|                                                                              |                                                               |
|------------------------------------------------------------------------------|---------------------------------------------------------------|
| IL-17A Signaling in Airway Cells                                             | CXCL3,NFKBIA,CCL20,CXCL1,CXCL5,IL6                            |
| The Visual Cycle                                                             | AKR1C3,RBP1                                                   |
| Role of Pattern Recognition Receptors in Recognition of Bacteria and Viruses | IFIH1,CXCL8,IL1A,C3,IL1B,CCL5,IL6,CSF2                        |
| Altered T Cell and B Cell Signaling in Rheumatoid Arthritis                  | IL1A,SPP1,HLA-B,IL1B,IL6,CSF2,TNFSF13B                        |
| Role of Osteoblasts, Osteoclasts and Chondrocytes in Rheumatoid Arthritis    | IL1A,SPP1,NFKBIA,IGF1,IL1B,IL6,CSF2,BIRC3,LRP1,MMP1,TNFRSF11B |
| Systemic Lupus Erythematosus Signaling                                       | HLA-G,IL1A,HLA-B,IL1B,IL6,TNFSF13B                            |
| Activation of IRF by Cytosolic Pattern Recognition Receptors                 | IFIH1,NFKBIA,IL6,ISG15                                        |
| Role of MAPK Signaling in the Pathogenesis of Influenza                      | CXCL10,CCL2,CCL5,PTGS2                                        |
| Hepatic Cholestasis                                                          | CXCL8,IL1A,NFKBIA,IL1B,IL6,CSF2,TNFRSF11B                     |
| LXR/RXR Activation                                                           | IL1A,C3,CCL2,IL1B,PTGS2,IL6,TNFRSF11B                         |
| Retinoate Biosynthesis I                                                     | AKR1C3,RBP1                                                   |
| Bile Acid Biosynthesis, Neutral Pathway                                      | AKR1C1/AKR1C2,AKR1C3                                          |
| Methylglyoxal Degradation III                                                | AKR1C1/AKR1C2,AKR1C3                                          |
| Airway Pathology in Chronic Obstructive Pulmonary Disease                    | CXCL8,CXCL3,MMP1                                              |
| IL-6 Signaling                                                               | CXCL8,IL1A,NFKBIA,IL1B,IL6,TNFRSF11B                          |

|                                                            |                                   |
|------------------------------------------------------------|-----------------------------------|
| Crosstalk between Dendritic Cells and Natural Killer Cells | HLA-G,IL3RA,HLA-B,IL6,CSF2,CAMK2B |
| Triacylglycerol Degradation                                | NDST3,LIPG                        |
| Induction of Apoptosis by HIV1                             | NFKBIA,CXCR4,BIRC3,TNFRSF11B      |
| Cholecystokinin/Gastrin-mediated Signaling                 | IL1A,IL1B,EPHA4,PTGS2             |
| OX40 Signaling Pathway                                     | HLA-G,NFKBIA,HLA-B                |
| Chemokine Signaling                                        | CCL2,CXCR4,CCL5,CAMK2B            |
| Role of Tissue Factor in Cancer                            | CXCL8,VEGFC,IL1B,CXCL1,CSF2,MMP1  |
| Antigen Presentation Pathway                               | HLA-G,HLA-B                       |
| PPAR Signaling                                             | IL1A,NFKBIA,IL1B,PTGS2,TNFRSF11B  |

---
